# Supplementary material for: Estimation of chimpanzee age based on DNA methylation
Source: PubMed Central journal article supplement (PMC6030051; doi:10.1038/s41598-018-28318-9), 2018-07-03
Supplement: 41598_2018_28318_MOESM1_ESM.pdf [file 41598_2018_28318_MOESM1_ESM.pdf]

Supplementary information

Title: Estimation of chimpanzee age based on DNA methylation

Hideyuki Ito<sup>1,2</sup>, Toshifumi Udono<sup>1</sup>, Satoshi Hirata<sup>1</sup>, Miho Inoue-Murayama<sup>1\*</sup>

<sup>1</sup>Wildlife Research Center, Kyoto University, Kyoto, Japan

<sup>2</sup>Kyoto City Zoo, Kyoto, Japan

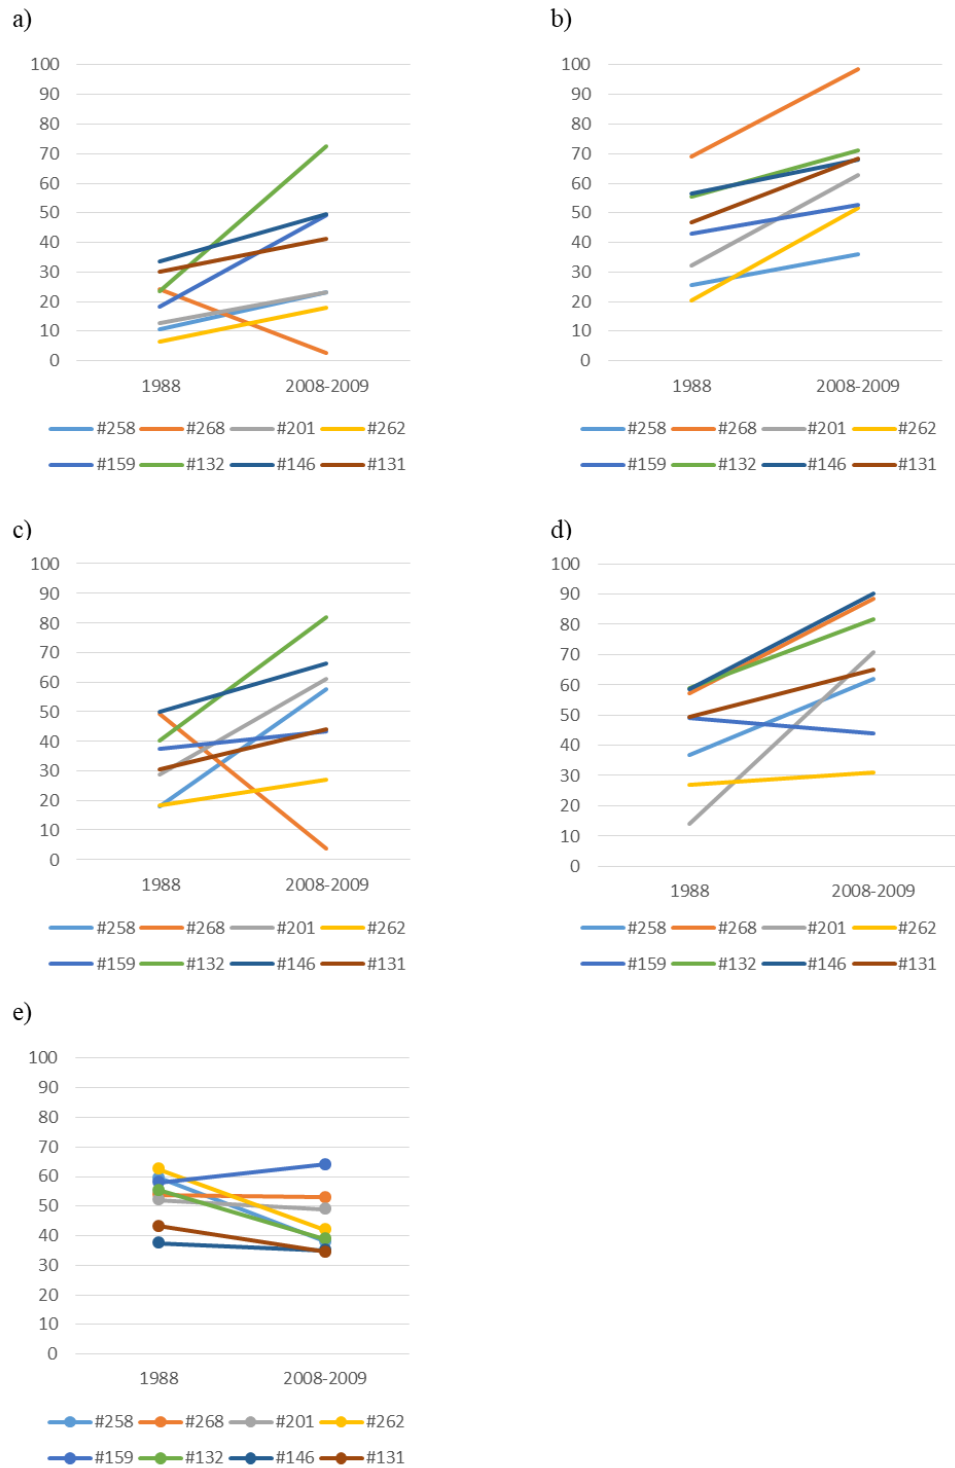

**Figure S1. Alterations in Methylation Over 20 Years at Each DNA Methylation Site**

Numbers is vertical axis indicate percentage of methylation. #number indicates GAIN ID number. (a) *ELOVL2*-CpG1, (b) *ELOVL2*-CpG3, (c) *ELOVL2*-CpG6, (d) *ELOVL2*-CpG7, and (e) *CCDC102B*-CpG1
